# Supplementary material
Source: PubMed Central journal article supplement (PMC4978052)

# **Competing Actions of Type 1 Angiotensin Receptors on T Lymphocytes and Kidney Epithelium During Cisplatin-Induced Acute Kidney Injury**

Jiandong Zhang,\* Nathan P. Rudemiller,\* Mehul B. Patel,\* QingQing Wei,<sup>†</sup> Norah S. Karlovich,\* Alexander D. Jeffs,\* Min Wu,\* Matthew A. Sparks,\* Jamie R. Privratsky,<sup>‡</sup> Marcela Herrera,\* Susan B. Gurley,\* Sergei A Nedospasov,<sup>#</sup> Steven D. Crowley\*

\*Division of Nephrology, Department of Medicine, and <sup>‡</sup>Department of Anesthesiology, Duke University and Durham VA Medical Centers, Durham, NC

<sup>†</sup>Department of Cellular Biology and Anatomy, Georgia Regents University, Augusta, GA

<sup>#</sup>Lomonosov Moscow State University and Engelhardt Institute of Molecular Biology, Moscow 119991, Russia.

Correspondence to Steven D. Crowley, Box 103015, Duke University Medical Center, Durham, NC 27710.

Tel: 919-684-9788

Fax: 919-684-3011

E-mail: [steven.d.crowley@duke.edu](mailto:steven.d.crowley@duke.edu)

Running title: AT1 receptors in cisplatin AKI

Word Count: 2,262

## Supplemental Methods

To delete the AT<sub>1A</sub> receptor selectively from T lymphocytes we bred the *CD4-Cre* mouse line with an *Agtr1a flox* line harboring loxP sites on either side of the coding region for the AT<sub>1A</sub> receptor. For our experiments, we employed female *CD4 Cre<sup>+</sup> Agtr1a<sup>flox/flox</sup>* mice (*TKO*) and *CD4 Cre<sup>-</sup> Agtr1a<sup>flox/flox</sup>* (*WT*) littermates. To confirm T cell-specific deletion of AT<sub>1A</sub> receptors in our *TKO* animals, we harvested splenocytes and labeled them for the T lymphocyte markers CD4 and CD8 and the B lymphocyte marker CD19. Through fluorescent cell sorting, we isolated cell populations expressing 1 of these 3 markers: CD4<sup>+</sup> T cells (CD4<sup>+</sup>CD8<sup>-</sup>CD19<sup>-</sup>), CD8<sup>+</sup> T cells (CD8<sup>+</sup>CD4<sup>-</sup>CD19<sup>-</sup>), and B lymphocytes (CD19<sup>+</sup>CD4<sup>-</sup>CD8<sup>-</sup>). RNA was subsequently harvested from these purified immune cell populations and from kidney and heart. We then performed real-time PCR for the *Agtr1a* gene to confirm the degree and precision of T cell-specific deletion. Compared with their *WT* littermates, *TKO* mice exhibited over 90% deletion of the *Agtr1a* gene from both CD4<sup>+</sup> and CD8<sup>+</sup> T cells, but preserved AT<sub>1A</sub> receptor expression in all other tissues examined (Fig. S1).

## Supplemental Figure Legends

**Supplemental Figure 1.** Verification of specific AT<sub>1A</sub> receptor deletion in T lymphocytes from female TKO mice. Splenocytes were harvested from female *CD4 Cre<sup>-</sup> Agtr1a<sup>flox/flox</sup>* mice (WT) and *CD4-Cre<sup>+</sup> Agtr1a<sup>flox/flox</sup>* littermates (TKO), and sorted into 3 subpopulations (n=6 per group). Figure shows mRNA expression of *Agtr1a* in different tissues and cell subpopulations from WT and TKO groups.

**Supplemental Figure 2.** AT<sub>1</sub> receptor blockade equalizes AKI levels in cisplatin-treated WT and TNF KKO mice. (A-B) Kidney function in WT and TNF KKO (“Ksp TNF KO”) mice treated with cisplatin plus losartan as measured by (A) BUN and (B) serum creatinine (n≥9).

## Supplemental Figure 1

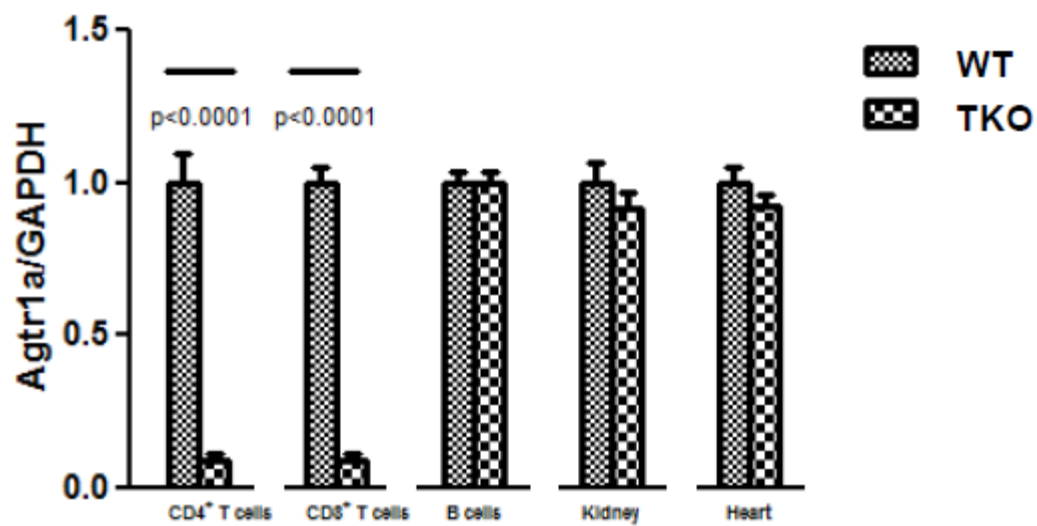

# Supplemental Figure 2

**A**

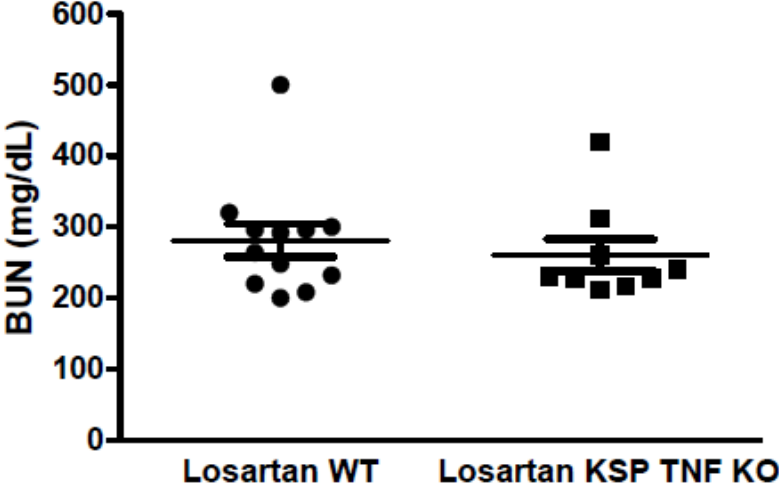

**B**

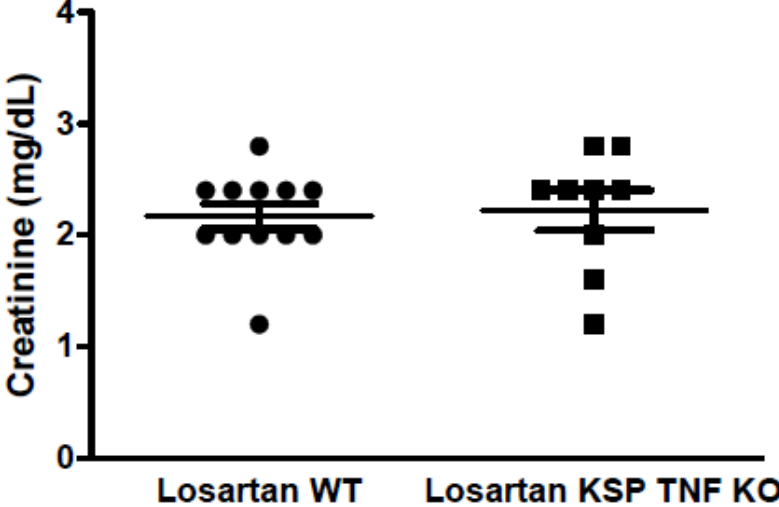

Supplement: ASN.2015060683_ASN2015060683SupplementaryData.pdf [file ASN.2015060683_ASN2015060683SupplementaryData.pdf]
